# Going through the motions: incorporating movement analyses into disease research

Eric R. Dougherty<sup>1,\*</sup>, Dana P. Seidel<sup>1,\*</sup>, Colin J. Carlson<sup>1</sup>, Orr Spiegel<sup>2</sup>, and Wayne M. Getz<sup>1,3</sup>

\* equal contributors

<sup>1</sup>Department of Environmental Science Policy and Management, University of California, Berkeley

<sup>2</sup>Mitrani Department of Desert Ecology, Jacob Blaustein Institutes for Desert Research, Ben-Gurion University of the Negev, Israel

<sup>3</sup>Schools of Mathematical Sciences, University of KwaZulu-Natal, South Africa

February 6, 2018

## Authors & emails:

Eric Dougherty (*corresponding author*)

dougherty.eric@berkeley.edu

address: 130 Mulford Hall #3114, Berkeley, CA 94720

phone: (914) 715-8056; fax: (510) 643-5438

Dana P. Seidel; dpseidel@berkeley.edu

Colin J. Carlson; cjcarlson@berkeley.edu

Orr Spiegel; orr.spiegel@mail.huji.ac.il

Wayne M. Getz; wgetz@berkeley.edu

**Author's contributions:** ED and WG conceived of the idea. ED and DS contributed equally to the writing and revision. CC, OS, and WG contributed to framing, writing, and editing. ED, DS and WG created the figures.

**Data accessibility statement:** The authors confirm that, should the manuscript be accepted, the data supporting the results will be archived in FigShare and the data DOI will be included at the end of the published article.

**Abbreviated Title:** Movement in Disease Research

**Keywords:** Movement Ecology, Disease Ecology, Exposure, Transmission, Host Heterogeneity

**Type of Article:** Review & Synthesis

**Number of Figures:** 6

**Number of Tables:** 1

**Number of Text Boxes:** 3

**Number of words in the abstract:** 192

**Number of words in the main text:** 6,872

**Number of words in Box 1:** 551

**Number of words in Box 2:** 737

**Number of words in Box 3:** 599

**Number of References:** 109

## 1 **Abstract**

2 Though epidemiology dates back to the 1700s, most mathematical representations of epidemics  
3 still use transmission rates averaged at the population scale, especially for wildlife diseases. In  
4 simplifying the contact process, we ignore the heterogeneities in host movements that complicate  
5 the real world, and overlook their impact on spatiotemporal patterns of disease burden. Move-  
6 ment ecology offers a set of tools that help unpack the transmission process, letting researchers  
7 more accurately model how animals within a population interact and spread pathogens. Ana-  
8 lytical techniques from this growing field can also help expose the reverse process: how infection  
9 impacts movement behaviors, and therefore other ecological processes like feeding, reproduction,  
10 and dispersal. Here, we synthesize the contributions of movement ecology in disease research,  
11 with a particular focus on studies that have successfully used movement-based methods to quan-  
12 tify individual heterogeneity in exposure and transmission risk. Throughout, we highlight the  
13 rapid growth of both disease and movement ecology, and comment on promising but unexplored  
14 avenues for research at their overlap. Ultimately, we suggest, including movement empowers  
15 ecologists to pose new questions expanding our understanding of host-pathogen dynamics, and  
16 improving our predictive capacity for wildlife and even human diseases.

## 17 Introduction

18 Disease ecology is a fairly young field, especially compared to epidemiology, which dates back  
19 centuries. The two fields overlap often, and share a similar goal: to understand, predict, and  
20 (sometimes) prevent disease outbreaks. However, disease ecologists face at least two additional  
21 challenges unique to wildlife research. First, disease ecology frequently requires a broad, multi-  
22 species perspective that captures complex and counter-intuitive ecosystem dynamics; for ex-  
23 ample, invasive Burmese pythons' selective feeding within mammal communities has indirectly  
24 increased mosquitoes' feeding on rodents, in turn amplifying the Everglades virus, which causes  
25 encephalitis in humans (Hoyer *et al.* 2017). Second, and equally challenging, is the fact that  
26 behavior is just as important for wildlife as for human disease, but harder for researchers to  
27 directly interrogate. Epidemiologists frequently use interviews and observational work to study  
28 how human behaviors such as sexual activity, international travel, or outdoor labor become risk  
29 factors for infectious disease—often directly inspiring interventions; animal behavior, while just  
30 as important to disease transmission, is harder to observe and predict in nature.

31 Movement ecology, also a comparatively young field, uses high-resolution spatiotemporal  
32 data to make sense of animal behavior. The “movement ecology paradigm” treats movement as  
33 the outcome of behavioral decisions influenced by the interplay of animals' internal states (e.g.,  
34 physiological needs), external biological factors (e.g., predation or competition), and the physical  
35 environment (e.g., mountain ranges or water sources) (Nathan *et al.* 2008). Researchers track-  
36 ing and modeling animal movement can extract behavioral states from telemetry and associated  
37 datasets, test hypotheses about what best predicts animal behavior, and explain how individ-  
38 ual behavior scales up to landscape-level patterns of animal distributions. Recent advances in  
39 telemetry technology (Kays *et al.* 2015), the development of corresponding analytical methods  
40 (Long & Nelson 2013), and the integration of complimentary datasets (e.g., acceleration data;  
41 Wilmers *et al.* 2015; Spiegel *et al.* 2015a) have all dramatically increased movement ecologists'  
42 inferential power. Especially in light of these developments, ecologists can decompose the im-  
43 pact of individual behavioral heterogeneity on pathogen spread with much greater ease, making  
44 movement ecology a promising avenue for exploring the behavioral underpinnings of how and  
45 why diseases spread in wildlife.

46 Both movement and disease originate in animal behavior at the individual level, and a  
47 feedback loop between the two emerges over time at broader ecological scales. For example,

48 ecological theory suggests that the source-sink dynamics that naturally emerge between high- and  
49 low-quality habitat (respectively) can be reversed by an environmentally-transmitted disease,  
50 which turns high-quality habitat into an ecological “trap” (Leach *et al.* 2016). In practice, animal  
51 movement is driven by decisions that balance this trade-off between habitat quality and disease  
52 risk, and behavioral polymorphisms might even evolve as a consequence (Getz *et al.* 2015).  
53 For example, in an anthrax-endemic region of Namibia, zebra (*Equus quagga*) demonstrate a  
54 pattern of partial migration, where dominant herds appear to migrate away from high-quality  
55 habitat during the anthrax season, leaving behind lower-ranking resident herds to graze despite  
56 the higher disease risk (Zidon *et al.* 2017). Researchers posing questions solely about movement  
57 (why would zebra migrate away from high quality habitat?) or disease (why do some zebra  
58 select for areas with higher anthrax exposure risk?) would miss the overall pattern.

59 Understanding ecological links between movement and disease has direct implications for  
60 the way researchers model, forecast, and simulate wildlife disease outbreaks. The most basic  
61 models in epidemiology treat disease transmission as a function of the number of healthy and  
62 infected individuals in a population, linked by a transmission parameter ( $\beta$ ). Doing so implicitly  
63 combines contact rates and transmission efficiency into one rate (McCallum *et al.* 2017), but  
64 individual heterogeneity in both is universally recognized as an important contributor to disease  
65 dynamics in humans (Lloyd-Smith *et al.* 2005a) and animals (Paull *et al.* 2012), and heterogene-  
66 ity in movement can be an important predictor of this variation (Spiegel *et al.* 2017a). Where  
67 tools in movement ecology can help measure, describe, and predict heterogeneity in transmis-  
68 sion between hosts, there are opportunities to pose novel questions relating to the effects of  
69 movement on contact (e.g., how do social networks structure contact rates?), the effects of  
70 contact on transmission (e.g., how does duration and proximity of contact affect the pathogen  
71 dose transmitted?), and the impact of infection on movement (e.g., does infection decrease or  
72 increase future contacts?). According to appropriate complexity methods in modeling (Larsen  
73 *et al.* 2016; Getz *et al.* 2017), the degree to which movement data should be incorporated into  
74 disease models depends on the kinds of questions being asked; but simultaneously, the resolution  
75 of available data on both movement and disease, and the level of prior knowledge, constrain the  
76 questions that ecologists can feasibly answer (Figure 1).

77 Here we synthesize the main ways that movement data are currently used to shed light on  
78 the processes underlying disease transmission, connecting animal behavior to broad patterns of  
79 wildlife (and human) health. Researchers unfamiliar with one or both fields are encouraged to

80 refer to Boxes 1 and 2 for short primers on disease and movement ecology, respectively. We begin  
81 by describing how tools and methods from movement ecology can inform our understanding of  
82 how movement affects disease, potentially improving epidemiological models by better represent-  
83 ing behavioral variation. Subsequently, we explore a more tentative application showing how  
84 movement data might directly improve disease surveillance. Throughout, we emphasize case  
85 studies that have successfully applied movement-based methods in these ways, and comment on  
86 particularly unexplored avenues and underutilized tools. Finally, we highlight the current state  
87 of synthesis work at the intersection of movement and disease ecology, and discuss the advances  
88 in data and models needed to move the field forward. In doing so, we recommend relevant  
89 movement ecology tools for studying processes underlying disease transmission (Table 1), and  
90 conclude by highlighting the broader implications for conservation and human health.

## 91 **Movement affects Disease**

92 Depending on a pathogen's mode of transmission, different tools in movement ecology will be  
93 more or less suitable for exploring transmission risk. We make the broadest possible division,  
94 placing pathogen life histories along a spectrum between direct and indirect transmission (Fig-  
95 ure 2). Direct transmission refers to pathogens that require contact between an infected and  
96 susceptible animal at the same place *and* at the same time. Indirect transmission, on the other  
97 hand, describes pathogens that can occupy some intermediate reservoir or vector between hosts  
98 (i.e., a host of another species, or an environmental reservoir like soil or water), making spatial  
99 overlap a more significant requirement than temporal overlap. Whether a pathogen is treated  
100 as directly or indirectly transmitted should depend on both the duration of time it can survive  
101 outside of hosts, and its ability to disperse in the environment separate from host movement.  
102 Temporal overlap between animals matters less when infective stages survive for extended peri-  
103 ods outside of hosts, or when the infective stage moves independently (e.g., when environmental  
104 forces induce relatively long-distance dispersion, a feature common in marine systems where  
105 pathogens are often at the mercy of currents; Lafferty 2017).

106 Broad categories of infectious agents (bacteria, viruses, parasites, etc.) are unlikely to map  
107 neatly onto direct or indirect transmission. For example, some ectoparasites are directly trans-  
108 mitted among members of a social group (e.g., some species of avian lice; Rózsa *et al.* 1996),  
109 whereas others often spend time freely moving off-host (e.g., several tick species that infect rep-

110 tiles; Sih *et al.* 2017). Some pathogens may also alternate between direct and indirect modes;  
111 for example, Zika virus and canine leishmaniasis are both vector-borne diseases with rare sex-  
112 ual transmission events. Similarly, influenza is usually directly transmitted through air or direct  
113 contact, but can sometimes persist in the environment via fomites (nonliving object or substance  
114 capable of carrying infectious material) for hours or days (Weber & Stilianakis 2008). Whether  
115 researchers choose to focus on spatial or spatiotemporal overlap, corresponding to direct or in-  
116 direct contact, is likely to depend on the scale at which other host processes are modeled, and  
117 the spatial and temporal extent of the analysis (see Box 3).

## 118 **Direct Transmission**

119 Directly transmitted pathogens rely on contact between infected and susceptible individuals.  
120 Contact rates (process  $C$  in Figure 1) are most easily thought of based on the frequency and  
121 strength of interactions between animals in a population, a problem that lends itself naturally  
122 to network methods (Silk *et al.* 2017a,b). Meanwhile, the probability of transmission during  
123 contact ( $P$  in Figure 1) will depend largely on the duration and nature (e.g., grooming vs.  
124 fighting) of the contact needed for pathogens to spread, which can be incorporated into network  
125 analyses in various ways.

126 Networks are a statistical model that abstract population structure as a set of connected  
127 nodes, traditionally representing individual animals in the population. Edges indicate the con-  
128 nections between individuals, whether these are defined as interactions of a certain duration, or  
129 individuals coming within a certain distance of one another. Such information can be displayed  
130 graphically through the use of directionality (arrows) or weight (line thickness). Directionality  
131 could indicate an epidemiologically-relevant behavior that impacts the actors differently (e.g.,  
132 grooming), while weight can be derived from the frequency or duration of such interactions  
133 (Cross *et al.* 2005). The components of a social network may ultimately be spatially implicit  
134 (i.e., animals' position in the network cannot be projected onto a map), but these networks can  
135 be informed by movement data in cases where in-person behavioral observation is impractical  
136 or infeasible, making them a valuable tool for reconstructing the spread of directly-transmitted  
137 disease. Networks can also be constructed in the context of indirect transmission, but might  
138 require different data (e.g., capture histories from an array of traps; Davis *et al.* 2015) or the  
139 inclusion of a time lag to emphasize the spatial component of transmission (e.g., Sih *et al.* 2017).  
140 For a visual example of these concepts, see Figure 3.

141 Most networks extracted from movement data are proximity based social networks (PBSNs).  
142 They can be constructed using either special proximity sensors, or from movement data using  
143 a spatiotemporal threshold value to designate contact between animals (e.g., within  $M_c$  meters  
144 for at least  $T_c$  time units; Farine & Whitehead 2015). Observed association patterns in social  
145 networks are often compared to expected patterns in null models (e.g., ideal gas model) or ran-  
146 domized networks, to test hypotheses about the mechanisms underlying social structure (Farine  
147 2017; Silk *et al.* 2017b). For example, by randomizing the order of daily movement paths *within*  
148 each individual, rather than *between* individuals (as is typical in most network randomization  
149 methods), Spiegel *et al.* (2016) developed a method to assess sociality separate from associations  
150 resulting from the spatial structure of the environment. An extension of this approach allowed  
151 for the identification of the locations of interactions and revealed the sex-specific patterns un-  
152 derlying the network structure (Spiegel *et al.* 2017b). These networks have been a key part of  
153 efforts to understand how ticks are transmitted in sleepy lizards (*Tiliqua rugosa*), reptiles with  
154 an unusual life-long pair breeding pattern that may facilitate tick transmission (Sih *et al.* 2017).

155 Social networks can provide insights into disease spread even in the absence of explicit dis-  
156 ease data (Craft & Caillaud 2011). Different species' social behavior may correspond broadly  
157 to different network structures, and corresponding outbreak dynamics; for example, social hi-  
158 erarchies may comparatively limit the rapid spread of epidemics, whereas “gregarious” species  
159 with connected, unfragmented social networks are prone to major outbreaks (Sah *et al.* 2017b).  
160 At the population level, the overall characteristics of a network (e.g., average degree of nodes,  
161 path lengths, and edge densities) can be vital for understanding the hypothetical implications  
162 for transmission (Craft 2015), including vulnerability to epidemic spread (Porphyre *et al.* 2008;  
163 Craft *et al.* 2011). In a meta-analysis, Sah *et al.* (2017a) found that modularity (i.e., the strength  
164 of division of a network into separable components) has a surprisingly limited effect on outbreak  
165 size and duration, especially for higher levels of modularity. However, fragmented networks with  
166 high subgroup cohesion still experience comparatively limited and brief outbreaks. In a rele-  
167 vant case study, Hamede *et al.* (2009) used proximity sensors to build a comprehensive contact  
168 network of Tasmanian devils (*Sarcophilus harrisii*) in a population at risk from the introduc-  
169 tion of a directly-transmitted parasitic cancer. The entire population was connected in a single  
170 network, allowing the spread of a pathogen from a single individual—and therefore, preventing  
171 most containment efforts in the event of an outbreak (Figure 3).

172 At the individual scale, networks can show where individual heterogeneity in transmission



173 occurs (Lloyd-Smith *et al.* 2005b; Perkins *et al.* 2009; Paull *et al.* 2012). Similar metrics to  
174 those employed at the population level can also describe single nodes or edges within a network,  
175 potentially illuminating differences among individuals within a population (White *et al.* 2017;  
176 Silk *et al.* 2017a). For instance, Weber *et al.* (2013) found that degree (the number of connections  
177 a given node has to other nodes), closeness (effective distance between an individual and all  
178 others in the network), and flow betweenness (a measure of the role of a particular node in  
179 connecting all other pairs of nodes in the network) were associated with tuberculosis infections  
180 in badgers (*Meles meles*). Because causality could not be determined, the researchers concluded  
181 that either an individual's network position could affect infection risk, or that infection could  
182 affect network position. By showing how heterogeneity among hosts propagates an infection  
183 through a susceptible population, analyses such as these could help identify super-spreaders,  
184 which in turn could help improve estimates of  $R_0$  (i.e., the expected number of secondary cases  
185 produced by a single infection in a completely susceptible population; see Box 1; Lloyd-Smith  
186 *et al.* 2005b).

187 The use of proximity data synchronized with GPS and accelerometer data can help better  
188 identify social interactions that are epidemiologically-relevant (Nathan *et al.* 2012; Brown *et al.*  
189 2013). Some pathogens require sexual contact for transmission (like herpes viruses), whereas oth-  
190 ers need only a brief physical contact (like influenza). In this sense, movement-based behavioral  
191 analyses can decompose sociality into interactions with implications for disease transmission,  
192 improving the relevance of network analyses. Even without network data, movement analyses  
193 might identify behaviors that can be linked to interactions among individuals (Bartumeus *et al.*  
194 2005; Fryxell *et al.* 2008) or to the social standing of individuals (Wittemyer *et al.* 2008), al-  
195 lowing for inferences about the vulnerability of individuals to disease. For example, Wittemyer  
196 *et al.* (2008) used wavelet analysis of three-hourly location data to infer that the social rank of  
197 elephants (*Loxodonta africana*) affects the periodicity of their movement at a multiday scale.  
198 In addition, they found that lower social standing correlated with higher movement variability  
199 during the resource-deficient dry season. This and similar analyses can be used to identify which  
200 individuals might interact most frequently (here, based on social rank). They could also be used  
201 to identify individuals whose irregular access to resources stresses them to the point where they  
202 become vulnerable to infection. Social structure could influence susceptibility in other ways  
203 (Altizer *et al.* 2003). For example, social rank can determine the form and frequency of breeding  
204 behaviors in the group, making it especially relevant for sexually-transmitted infections. Addi-



tionally, social living could confer anti-parasite benefits such as increased parasite resistance or tolerance (e.g., due to regular or low dose transmission between conspecifics), or could mitigate disease (e.g., due to increased fitness as a result of superior resource acquisition in a group; Ezenwa *et al.* 2016).

## Indirect Transmission

In the case of pathogens and parasites that are transmitted indirectly (Figure 2), the processes by which a one host sheds a pathogen and another host is exposed are independent and might rely upon different host behaviors (e.g., defecation for the former and foraging for the latter). Tools from movement ecology offer a way to consider these processes separately from the perspective of the infected individual and susceptible individual at various time scales (sub-hourly to multi-week time, as depicted in Figure 1).

High resolution movement data (i.e., sub-hourly: Figure 1) enable researchers to estimate the frequency and duration of encounters with known pathogen hotspots on a landscape (e.g., mosquito breeding sites at standing water). Though practical considerations might limit the number of animals that can be monitored in a study population (Williams *et al.* 2014), appropriate sampling schemes offer a basis for statistical inferences that apply more broadly. For example, existing tools can identify associations between habitats or time periods and animal presence, thereby offering insight into overlaps with infectious sites (Figure 4). Further, if movement data help identify behavioral drivers (e.g., resource distribution and its seasonal changes), then insights from the monitored subset of the population could be used to mechanistically model encounter probabilities or factors contributing to shared space use (e.g., Cross *et al.* 2005; Spiegel *et al.* 2015b).

Clustered observations reflect spatial regions that individuals frequent, and can indicate areas where encounters among individuals (tagged or untagged) are more likely. Applying techniques to identify such clusters in data from multiple animals (Webb *et al.* 2008; Seidel & Boyce 2015; Van Moorter *et al.* 2016) can aid in identifying population-wide aggregation points with potential epidemiological significance. These aggregation points might reflect underlying environmental heterogeneity (e.g., waterholes) or social contacts (e.g., leks) (McNaughton 1988; Carter *et al.* 2009); regardless of the mechanism driving aggregation, these locations are likely to be important for estimating relative exposure risk. Various methods can help distinguish social and environmental causes of such aggregation patterns (e.g., Spiegel *et al.* 2016; Borchering *et al.*

236 2017), potentially offering a way to assess transmission risk.

237 Areas of dense use are also identifiable through the construction of utilization distributions  
238 (UD), which illustrate the relative frequency distribution of the location of a particular individual  
239 over time (Van Winkle 1975). UDs are most commonly derived using kernel density estimation  
240 techniques (Worton 1989). Methods for estimating space use at broader scales, especially es-  
241 timates of seasonal range size and overlap, have been included in epidemiological models. For  
242 example, Ragg & Moller (2000) used radiocollars, in conjunction with other methods, to track  
243 the microhabitat selection of both active and denning feral ferrets (*Mustela furo*), a vector of  
244 bovine tuberculosis (*Mycobacterium bovis*) in New Zealand. Ferret movements were found to be  
245 concentrated in grazed areas and at ecotones between pastures and vegetation cover, thereby  
246 increasing their risk of transmitting tuberculosis to possums and livestock. Similarly, Conner &  
247 Miller (2004) used cluster analysis on mule deer (*Odocoileus hemionus*) location data to iden-  
248 tify population units, and used kernel density estimation to delineate seasonal ranges for each  
249 population. Subsequent analysis showed that winter ranges rarely overlapped ( $< 1\%$ ), likely  
250 due to their smaller size, whereas summer ranges had  $>22\%$  overlap among population units.  
251 Therefore, researchers concluded that summer ranging behavior was likely responsible for the  
252 spread of CWD among subpopulations, whereas winter ranging behavior had the potential to  
253 amplify CWD prevalence within a subpopulation if an infected individual was present. In an  
254 extension of the study, Farnsworth *et al.* (2006), used area estimates of summer, winter, and in-  
255 dividual home ranges to frame regression models at different scales. They found that movements  
256 within individual home ranges had the greatest implications for CWD exposure, highlighting  
257 the potential of high-resolution movement data to alter our understanding of the mechanisms  
258 underlying observed patterns of transmission.

259 Novel methods that consider the temporal autocorrelation inherent in movement data enable  
260 more detailed home-range delineations than those that emerge from traditional, purely spatial,  
261 estimators (Benhamou & Riotte-Lambert 2012; Lyons *et al.* 2013). Additionally, these methods  
262 might produce more accurate results when home-range overlap is used as a proxy for exposure  
263 risk, especially in cases where the pathogen's ability to survive outside a host is limited. One  
264 such method, time-local convex hulls (T-LoCoH; Lyons *et al.* 2013), creates time-dependent  
265 hulls within the utilization distribution from which various metrics can be derived. Two such  
266 metrics are the duration of a visit to a particular point or area of interest, known as the residence  
267 time, and the rate at which individuals return to them, known as the visitation or return rate.

268 Used together, these metrics can offer a means of evaluating the relative risk of contact or  
269 exposure among individuals (Dougherty *et al.* 2017). Site-fidelity metrics such as these could  
270 be particularly important in the case of indirectly transmitted pathogens, because high levels  
271 of fidelity increase exposure risk if an infectious reservoir is present in the range, but will buffer  
272 an individual from exposure if the range is free of relevant pathogens or parasites. Thus, higher  
273 mean visitation and duration rates should indicate greater heterogeneity of infection risk across  
274 individuals in a spatially-structured population.

275 Beyond general descriptions of space use, tools that explore landscape level patterns and  
276 probability of use—which are some of the most developed in movement ecology—can offer pre-  
277 dictions regarding where susceptible individuals might be exposed to disease. Habitat-selection  
278 methods, such as resource-, path-, or step-selection functions (RSF, PSF, and SSF, respectively),  
279 can illuminate landscape features and types preferred by individual hosts or the population as  
280 a whole (Leclerc *et al.* 2016). These methods, used to infer the probability of use of any given  
281 resource unit within the range of a population, quantify which habitats animals select within  
282 their range (Boyce & McDonald 1999; Manly *et al.* 2002). By comparing points used by animals  
283 in the population to those available but unused within their range, RSFs provide a statistical  
284 model of habitat preference (Boyce *et al.* 2002). In the context of disease, these models can  
285 identify habitats where pathogen deposition and, thus, exposure are most likely to occur based  
286 upon their relative probability of selection. For example, Morris *et al.* (2016) built an RSF for  
287 elk (*Cervus elaphus*) ranging in the presence of soil-borne anthrax (*Bacillus anthracis*) in south-  
288 western Montana. Based on the preferences of the elk and a parallel evaluation of the landscape  
289 features that enabled long-term persistence of anthrax spores (with ecological niche modeling),  
290 Morris *et al.* (2016) mapped the areas of highest risk to the elk population.

291 In cases where pathogens or parasites are difficult to study but follow predictable patterns of  
292 occurrence on a landscape, RSFs and other movement tools could allow researchers to identify  
293 potential hotspots for vector-borne or environmental transmission (Figure 4) using GIS technol-  
294 ogy. The application of GIS is particularly suitable when vector preferences on a landscape are  
295 well understood, as in studies of the use of fragmented forests near agricultural land by ticks (a  
296 vector for Lyme disease; Allan *et al.* 2003; Brownstein *et al.* 2005) or mosquito use of standing  
297 water for breeding sites (Perkins *et al.* 2013). The relevance of these approaches will be strongly  
298 dependent on how far vectors can move, as well as the importance of dispersal in the life cycle  
299 of vectors and the overall prevalence of disease. A similar application can easily be imagined for

300 pathogens maintained in soil, such as anthrax (*Bacillus anthracis*) or plague (*Yersinia pestis*); or  
301 in water, such as cholera (*Vibrio cholerae*) or cryptosporidiosis (*Cryptosporidium parvum*). The  
302 pathogens in all four of these examples follow predictable patterns of occurrence and persistence  
303 based on abiotic environmental variables (Carlson *et al.* 2017). The dual RSF framework helps  
304 researchers to identify whether host populations select for areas with high infection risk. In  
305 addition, such methods can indicate whether certain individuals are using these features more  
306 than others, offering insight into the heterogeneity of exposure throughout the population.

## 307 **Disease affects Movement**

308 Movement tools may also provide a more direct (but underexplored) tool for disease surveillance,  
309 as infection often affects host behavior in observable ways. Pathogens can alter host movements  
310 either through vigor loss (i.e., the appropriation of resources towards an immune response) or  
311 host manipulation (direct chemical or physical modification by the pathogen). Examples of  
312 infection-induced behavioral shifts range from *Cordyceps* fungi in arthropods, which cause hosts  
313 to climb to the upper part of a plant before death (Roy *et al.* 2006), to *Toxoplasma gondii*  
314 in rats (*Rattus norvegicus*), which results in higher activity levels and loss of fear in infected  
315 hosts (Berdoy *et al.* 2000). Importantly, such changes can alter movement trajectories (Murray  
316 *et al.* 2015; Cross *et al.* 2016) in ways detectable by movement tools (e.g., risk-taking behavior  
317 or a dramatic shift in habitat preference), potentially allowing researchers to identify shifts in  
318 individuals' behavioral patterns once individuals become infected.

319 Movement trajectories can be characterized by sets of metrics extracted from consecutive  
320 relocations. These include step length (the distance between two consecutive points), relative  
321 turning angle (the angle between the trajectory indicated by two points relative to that inferred  
322 from the previous step), and persistence (the tendency of a movement to persist in a particular  
323 direction). Since these telemetry data are discrete, if they are not sufficiently fine-scaled, they  
324 cannot be used to characterize fundamental movement elements (FMEs, Box 2; Getz & Saltz  
325 2008). They can, however, be used to cluster movement path segments into canonical activity  
326 modes (CAMs; Figure 5; Getz & Saltz 2008) using thresholds, clustering, and behavioral change-  
327 point techniques (Gutenkunst *et al.* 2007; Van Moorter *et al.* 2010; Gurarie *et al.* 2009, 2016).

328 The above movement trajectory metrics might differ sufficiently between healthy and in-  
329 fected individuals to allow them to be used to identify an individual's disease state. Further,

330 infection with a pathogen could affect daily activity budgets, potentially altering the number  
331 or distribution of change points seen across a day. The segmentation of movement paths into  
332 CAMs or, at a finer scale, behavioral states (Nathan *et al.* 2012), represents an active area of  
333 study in disease ecology (Edelhoff *et al.* 2016). For example, Cross *et al.* (2016) established that  
334 infection with mange (*Sarcoptic scabiei*) in wolves (*Canis lupus*) was associated with decreased  
335 daily movements, with later stages of infection reducing total distance more than earlier stages.  
336 In addition, infected wolves spent significantly less time in an active behavioral mode (defined  
337 as hourly movements greater than 50 meters) than healthy wolves, with degree of infection  
338 once again affecting activity level. Similar comparisons can be performed with data collected  
339 at a coarser scale, as exemplified by Murray *et al.* (2015), who demonstrated that disease state  
340 was related to differences in home-range size of coyotes (*Canis latrans*) infected with mange.  
341 Movement data derived from complementary sensors, on the other hand, offers researchers even  
342 deeper insight into the impacts of disease on movement behavior. Accelerometers, for example,  
343 enable the detection of tremors in individual paths and can help differentiate between bold ver-  
344 sus submissive walking gaits, which can be indicative of different disease states. In a study of  
345 cockroaches (*Blaberus craniifer*), Wilson *et al.* 2014 extracted the vectorial dynamic acceleration  
346 (VDA; Shepard *et al.* 2008), a metric for characterizing the tremors in an animal's movement,  
347 and found that the dynamism in each stride decreased with progressing fungal infection.

348 While the the application of movement ecology to disease diagnostics remains relatively  
349 unexplored, an ability to identify infected individuals from movement tracks could be highly  
350 useful in systems where diagnosis is difficult, invasive, or lethal (especially important for species  
351 of conservation concern). These methods might also enable researchers to infer the approximate  
352 onset time of symptoms, in turn improving disease models. The increasing availability of detailed  
353 movement data provides researchers an opportunity to develop and validate new methods along  
354 these lines.

## 355 **Synthesizing Movement and Disease**

356 Ecology, as a scientific discipline, advances through the interplay of data, models, and theory:  
357 work at the interface of movement and disease ecology is rapidly growing on all three fronts. We  
358 briefly comment on how models can bridge data-driven understanding into theoretical results,  
359 and then present a systematic literature review showing the biases in how different movement

360 tools are currently used to explain and predict disease dynamics.

### 361 **Scaling Models to Theory**

362 Compartmental models (Box 1) are a nearly universal tool for studying human and wildlife  
363 diseases (Anderson *et al.* 1992; Keeling & Rohani 2008), and have been applied to a broad  
364 range of host-pathogen systems, with numerous extensions for host-age effects, pathogen-strain  
365 effects, or even the influence of pathogens on host behavior. Compartmental models, however,  
366 are not easily adapted to account for the effects of landscape and population spatial structures  
367 on *risk of infection* (Figure 4). Accounting for this level of variation requires a representative  
368 sample of individuals within the population to be tracked and their contact rates with other  
369 individuals (direct transmission) or infectious environmental locations (indirect transmission)  
370 recorded. Mechanistic models allow researchers to upscale individual patterns (such as behav-  
371 ioral rules or contact patterns) to a broader population, and are frequently used to validate  
372 or test experimental results. For example, disease outbreaks are easy to project on simulated  
373 networks, allowing researchers to confirm hypotheses about how modularity and fragmentation  
374 link animal social structure to outbreak size (Sah *et al.* 2017a,b). However, directly upscaling  
375 animal behavioral rules into spatiotemporal patterns of disease may require researchers to build  
376 individual- or agent-based models (IBM, ABM; Grimm *et al.* 2005).

377 More specifically, IBMs can use step length, turning angle, canonical activity mode distribu-  
378 tions, habitat or resource preferences, or even various network-based metrics to generate likely  
379 movement paths for all individuals in the population. With basic assumptions about transmis-  
380 sion rates as a function of contact duration, these trajectories can be used to simulate disease  
381 outbreaks on real landscapes with “real” animal movement principles. An number of IBMs that  
382 incorporate mechanistic movement rules to explore disease dynamics have been constructed  
383 (Bonnell *et al.* 2010; Dion *et al.* 2011; Tracey *et al.* 2014; Belsare & Gompper 2015). One of  
384 these (Bonnell *et al.* 2010) used individual host energy levels to generate movements toward  
385 higher resource patches. These foraging decisions ultimately drove microparasite transmission  
386 dynamics among red colobus monkeys (*Procolobus badius*) as they shifted their distributions on  
387 the landscape in search of food.

388 An obvious drawback of IBMs compared to compartmental models is the high computational  
389 demand associated with running simulations at this scale, though this limitation is becoming  
390 less prohibitive with the increasing availability of high performance computing. Perhaps a more

391 serious limitation, IBMs involve many more parameters than compartmental models, thereby  
392 increasing difficulties associated with verification and validation procedures (Filatova *et al.* 2013).  
393 In addition, IBMs generally include stochastic elements, which can make statistical inference  
394 using IBMs very challenging (Hartig *et al.* 2011). While recent methodological advances have  
395 overcome some of these limitations, they remain impediments to the broader application of IBMs  
396 in disease modeling. Continued efforts to synthesize movement and disease ecology, however,  
397 are likely to inspire the development of new solutions for translating risk (based on movement  
398 behaviors on a specific landscape) into generally applicable rates for epidemiological models.

399 We also caution that mechanistic models (individual-based or otherwise) that explicitly in-  
400 corporate movement rules from empirical data might not be transferable across space, or even  
401 across seasons or years. For instance, if environmental change alters behavior (e.g., annual mi-  
402 gration targets shift in response to climate change), even mechanistic models based on empirical  
403 movement data might become inaccurate. This could be problematic for predicting pathogen  
404 dynamics in response to rare movement events (e.g., atypical long-distance dispersal events) or  
405 transmission (e.g., cross-species spillover events). Some tools exist in epidemiology to address  
406 model building based on limited data (e.g., fitting  $R_0$  for rare spillover diseases; Blumberg &  
407 Lloyd-Smith 2013; Kucharski & Edmunds 2015), but this problem requires special attention in  
408 the context of movement research, and given the ongoing anthropogenic changes to local and  
409 global environments.

## 410 **Current State of the Synthesis**

411 In a review of Web of Science, we found 70 papers published between 2000 - 2017 using move-  
412 ment tools in disease research (see Supplementary Appendix 1 for details). For the purposes  
413 of the review, we did not include agent-based modeling studies without empirical basis, though  
414 we noted they followed similar biases. This literature review revealed a notable bias across  
415 study organisms (Figure 6). Most studies focused on pathogens that can spillover to human  
416 and domestic animal populations, including bovine tuberculosis (*Mycobacterium tuberculosis*),  
417 anthrax (*Bacillus anthracis*), brucellosis (*Brucella abortus*), foot and mouth disease (FMD; *Aph-*  
418 *thae epizooticae*), and chronic wasting disease (CWD). Hosts with relatively large bodies (e.g.,  
419 ungulates, carnivores, and mesocarnivores) were substantially more common than those with  
420 small bodies (e.g., birds, reptiles, amphibians, and small mammals). These biases might re-  
421 flect the high data requirements for many of the methods in movement ecology, meaning that



422 only extensively monitored systems are regularly considered at the level of individual hosts.  
423 Alternatively, the taxonomic bias in hosts could be indicative of technological limitations that,  
424 until recently, prohibited the tracking of animals with smaller bodies with advanced instru-  
425 ments; alternatively, taxonomic bias patterns closely track phylogenetic hotspots of zoonotic  
426 and agriculturally-relevant pathogens.

427 For the 70 studies that met the criteria for inclusion, all methods of analyses used by the  
428 researchers were sorted into four broad groups: spatial overlap, habitat selection, network anal-  
429 yses, and behavioral analyses. In several cases, more than one of these methods were used in a  
430 single study, resulting in a total of 91 analyses. Spatial overlap was the most frequently used  
431 analysis, with 41 cases applying some form of overlap method. These ranged from examinations  
432 of home range dynamics (e.g., Yockney *et al.* 2013) to studies that attempted to measure the  
433 number of contacts between animals (e.g., Woodroffe & Donnelly 2011), often using proximity  
434 sensors to do so (e.g., Marsh *et al.* 2011). Habitat selection analyses were also quite common,  
435 with 24 cases using selection functions (e.g., Morris *et al.* 2016) or performing basic comparisons  
436 between habitat types (e.g., Parsons *et al.* 2014). Similarly, studies that drew upon the wide  
437 array of network analysis tools were fairly common, with 19 constructing some form of network,  
438 often with the use of proximity sensors (e.g., Hamede *et al.* 2009). The least common form of  
439 analyses encountered during the literature review were behavioral analyses, where researchers  
440 explicitly measured the probability of a particular behavior (e.g., dispersal; Caron *et al.* 2016)  
441 or compared individuals of two different behavioral classes (e.g., migratory vs. resident; Pruvot  
442 *et al.* 2016). Only 6 cases of behavioral analysis appeared in the resulting literature. Since the  
443 role of behavior in influencing disease dynamics is well established, this represents an under-  
444 explored avenue for investigation of disease systems.

445 There was a demonstrable correlation between the mode of transmission (Figure 6) exhibited  
446 by a pathogen and the methods ultimately selected to study it. Although some studies (13) did  
447 not identify a transmission mode, many emphasized that whether the pathogen studied had a  
448 direct (20) or indirect (11) transmission route. Many studies (26), mostly on bovine tuberculosis,  
449 mention that both transmission modes are possible, but researchers often selected their methods  
450 based on one or the other (4 of the 26 emphasize direct transmission, while 7 focus on indirect).  
451 Of those studies focused on the indirect mode of transmission, spatial overlap methods were  
452 used in approximately 56%, habitat selection in about 44%, network analyses in nearly 17%,  
453 and behavioral analyses in only 6%. By contrast, studies of direct transmission used network-

454 based analyses (46%) and behavioral analyses (17%), but spatial overlap methods were nearly as  
455 common as in studies of indirect transmission (50%), and habitat selection methods were far less  
456 common (13%). These differences are to be expected: pathogens with particular transmission  
457 modes require the use of tools and methods relevant to the movement processes that underlie  
458 them.

## 459 Discussion and Future Directions

460 Complex patterns in ecology frequently emerge from simple rules at fine scales. As we high-  
461 light, basic rules of animal behavior drive the complex interplay of animal movement and disease  
462 dynamics; the implications for wildlife and human health are major. Incorporating movement  
463 behavior into epidemiological models could improve predictions of disease dynamics, provided  
464 the additional level of complexity is handled correctly (Getz *et al.* 2017). While we have high-  
465 lighted specific well-developed pairs of pathogen transmission mode and analysis methods (like  
466 networks and direct contact pathogens, or landscape models and vector-borne disease), we also  
467 note that many pathogens exploit several transmission strategies, and researchers will corre-  
468 spondingly need several methods in these cases. Developing protocols that include movement  
469 data in basic disease research, and vice versa, will be an important first step towards making  
470 these advances more feasible—and towards making broad advances in ecological theory, as some  
471 disease ecologists have begun to do with network methods (Sah *et al.* 2017a).

472 Movement tools will likely increase in value with ongoing improvements in biologging tech-  
473 nologies (Kays *et al.* 2015). For example, advancements in radar and radio-frequency technolo-  
474 gies allow tracking of a broader range of insect movements (Kissling *et al.* 2014), offering the  
475 potential to include these movements when considering vector-borne disease dynamics. Fur-  
476 ther, accelerometer-based data and very-high resolution GPS tracking (e.g., 1 Hz fix rates) will  
477 help researchers parse movement tracks at an even finer scale than current path segmentation  
478 methods allow (McClintock *et al.* 2017). In doing so, proximity-based social networks could be  
479 further informed with the behavioral states of individuals, potentially clarifying the epidemiolog-  
480 ical relevance of such points of contact (Spiegel *et al.* 2016; Sih *et al.* 2017; Spiegel *et al.* 2017b).  
481 The decreasing costs of these technologies could soon offer opportunities to monitor entire pop-  
482 ulations, thereby shifting researchers from extrapolating risk across a population to measuring  
483 contact rates directly. More comprehensive surveillance may also enable the development of

484 models that more accurately infer dose exposure, based on duration of contact between animals  
485 and infected hosts or environmental reservoirs, vastly improving models of the heterogeneity in  
486 transmission efficiency.

487        Though the host-environment and host-pathogen interactions reflected in movement data  
488 can offer significant insight into disease dynamics, important processes might also occur at  
489 the pathogen-environment (or vector-environment) interface. In benthic marine systems, for  
490 example, suspension-feeders that filter large volumes of water while feeding can be particularly  
491 vulnerable to infection by microparasitic pathogens floating in the water (Lafferty 2017). This  
492 accumulation process has been modeled through the incorporation of particle diffusion (Bidegain  
493 *et al.* 2016), but the nature of these pathogens and their deposition makes the precise tracking  
494 of their movements in such dynamic environments very difficult. Thus, the validity of forecasts  
495 based on host movement alone is in question when pathogen-environment interactions (e.g.,  
496 pathogen movement, rates of growth or decay, or the length of vector life history stages) occur  
497 at time scales comparable with the host-pathogen interactions themselves (e.g., lengths of latent  
498 and infectious periods). When response time scales are comparable, coupled host-pathogen-  
499 environment models are required. Though this has not been the emphasis of much of the  
500 recent work in movement ecology, the expansion of methods and technologies to accurately  
501 track minute particles through three-dimensional space is a frontier worthy of exploration. The  
502 resulting models could replace assumptions regarding the diffusion of such particles and further  
503 aid in our understanding of contact processes in highly dynamic environments.

504        Although we have focused on host populations, these tools also apply to multi-species trans-  
505 mission, such as in the spillover of wildlife diseases into livestock, or spillback of diseases from  
506 domesticated animals into wildlife (Barasona *et al.* 2014). Furthermore, these methods could  
507 just as easily be used to assess the risk of zoonotic spillover into human populations. Cur-  
508 rently, ecological niche modeling is a popular proxy for zoonotic disease risk, but this only  
509 summarizes high-level landscape patterns (often treating host-pathogen systems as one coupled  
510 phenomenon); replacing these, or combining them, with movement models like RSFs can more  
511 accurately characterize average or seasonal patterns of host movement, and therefore risk to hu-  
512 man health. In particular, in the case of pathogens that affect free-ranging and often migratory  
513 hosts such as bats (i.e., Ebola, Marburg, or Nipah viruses), overlap analyses could illuminate  
514 potential risk zones for future spillover events. With additional data collection using advanced  
515 monitoring devices, researchers can move beyond treating overlap (spatial or spatiotemporal

516 depending on the pathogen or parasite in question) as a proxy for contact; in fact, we note the  
517 clear but unexplored potential for animal movement studies to act as part of a realtime early  
518 warning system for difficult-to-surveil zoonoses.

519 With a common language and mutual appreciation for their respective disciplines, disease  
520 ecologists and movement ecologists can collaborate to help solve pressing problems. Like Ebola  
521 or Nipah, most emerging diseases spill over from wildlife (Jones *et al.* 2008). Controlling such  
522 diseases is difficult, and interventions can be controversial (e.g. wildlife cullings), infeasible (e.g.  
523 mass wildlife or livestock vaccination), or ineffective; for example, culling badgers can spread  
524 bovine tuberculosis because badgers will move into treated areas (Woodroffe *et al.* 2006). Study-  
525 ing animal movement might help predict disease spread (and help explain why some interventions  
526 fail), and identify new interventions, such as wildlife relocations or vaccination. Furthermore,  
527 movement ecologists can benefit from considering how parasites alter animal movement, thereby  
528 accounting for otherwise unexplained variation in movement among individuals. Advances in  
529 disease diagnosis, combined with new technologies that and remotely monitor an animal's phys-  
530 iology and motion make this an opportune time for studies to embrace both disease ecology and  
531 movement ecology.

## 532 Acknowledgements

533 The authors would like to acknowledge the Getz and Brashares Labs for their extensive feedback.  
534 This research was supported by grants NIH GM083863 (WMG) and NIH GM117617 (PI Jason  
535 Blackburn; ED and DS supported under a UC Berkeley subcontract). We also appreciate the  
536 invaluable guidance offered by Sadie Ryan, Jason Blackburn, and Jane Flegal. We also thank  
537 Matthew Silk, Kevin Lafferty, and anonymous reviewers for their considerable and thoughtful  
538 feedback that greatly improved our revisions.

## 539 References

- 540 Allan, B.F., Keesing, F., & Ostfeld, R.S. (2003). Effect of forest fragmentation on Lyme disease  
541 risk. *Conservation Biology*, 17, 267–272.
- 542 Altizer, S., Nunn, C.L., Thrall, P.H., Gittleman, J.L., Antonovics, J., Cunningham, A.A. *et al.*  
543 (2003). Social organization and parasite risk in mammals: integrating theory and empirical  
544 studies. *Annual Review of Ecology, Evolution, and Systematics*, 34, 517–547.
- 545 Anderson, R.M., May, R.M., & Anderson, B. (1992). *Infectious Diseases of Humans: Dynamics*  
546 *and Control*, volume 28. Wiley Online Library.

- 547 Barasona, J.A., Latham, M.C., Acevedo, P., Armenteros, J.A., Latham, A.D.M., Gortazar, C.  
548 *et al.* (2014). Spatiotemporal interactions between wild boar and cattle: implications for  
549 cross-species disease transmission. *Veterinary Research*, 45, 122.
- 550 Bartumeus, F., da Luz, M.E., Viswanathan, G., & Catalan, J. (2005). Animal search strategies:  
551 a quantitative random-walk analysis. *Ecology*, 86, 3078–3087.
- 552 Belsare, A.V. & Gompper, M.E. (2015). A model-based approach for investigation and mitigation  
553 of disease spillover risks to wildlife: Dogs, foxes and canine distemper in central India.  
554 *Ecological Modelling*, 296, 102–112.
- 555 Benhamou, S. & Riote-Lambert, L. (2012). Beyond the Utilization Distribution: Identifying  
556 home range areas that are intensively exploited or repeatedly visited. *Ecological Modelling*,  
557 227, 112–116.
- 558 Berdoy, M., Webster, J.P., & Macdonald, D.W. (2000). Fatal attraction in rats infected with  
559 *Toxoplasma gondii*. *Proceedings of the Royal Society of London B: Biological Sciences*, 267,  
560 1591–1594.
- 561 Bidegain, G., Powell, E., Klinck, J., Ben-Horin, T., & Hofmann, E. (2016). Microparasitic  
562 disease dynamics in benthic suspension feeders: infective dose, non-focal hosts, and particle  
563 diffusion. *Ecological Modelling*, 328, 44–61.
- 564 Blumberg, S. & Lloyd-Smith, J.O. (2013). Inference of R0 and transmission heterogeneity from  
565 the size distribution of stuttering chains. *PLoS Computational Biology*, 9, e1002993.
- 566 Bonnell, T.R., Sengupta, R.R., Chapman, C.A., & Goldberg, T.L. (2010). An agent-based model  
567 of red colobus resources and disease dynamics implicates key resource sites as hot spots of  
568 disease transmission. *Ecological Modelling*, 221, 2491–2500.
- 569 Borchering, R.K., Bellan, S.E., Flynn, J.M., Pulliam, J.R., & McKinley, S.A. (2017). Resource-  
570 driven encounters among consumers and implications for the spread of infectious disease.  
571 *Journal of The Royal Society Interface*, 14, 20170555.
- 572 Boyce, M.S. & McDonald, L.L. (1999). Relating populations to habitats using resource selection  
573 functions. *Trends in Ecology & Evolution*, 14, 268–272.
- 574 Boyce, M.S., Vernier, P.R., Nielsen, S.E., & Schmiegelow, F.K. (2002). Evaluating resource  
575 selection functions. *Ecological Modelling*, 157, 281–300.
- 576 Brown, D.D., Kays, R., Wikelski, M., Wilson, R., & Klimley, A.P. (2013). Observing the  
577 unwatchable through acceleration logging of animal behavior. *Animal Biotelemetry*, 1, 20.
- 578 Brownstein, J.S., Skelly, D.K., Holford, T.R., & Fish, D. (2005). Forest fragmentation predicts  
579 local scale heterogeneity of Lyme disease risk. *Oecologia*, 146, 469–475.
- 580 Carlson, C.J., Getz, W., Kausrud, K., Cizauskas, C., Blackburn, J., Carrillo, F.A.B. *et al.*  
581 (2017). Spores and soil from six sides: interdisciplinarity and the environmental biology of  
582 anthrax (*Bacillus anthracis*). *bioRxiv*, pp 165548.
- 583 Caron, A., Cornelis, D., Foggin, C., Hofmeyr, M., & de Garine-Wichatitsky, M. (2016). African  
584 buffalo movement and zoonotic disease risk across transfrontier conservation areas, Southern  
585 Africa. *Emerging infectious diseases*, 22, 277.
- 586 Carter, A.J., Macdonald, S.L., Thomson, V.A., & Goldizen, A.W. (2009). Structured association  
587 patterns and their energetic benefits in female eastern grey kangaroos, *Macropus giganteus*.  
588 *Animal Behaviour*, 77, 839–846.

- 589 Conner, M.M. & Miller, M.W. (2004). Movement patterns and spatial epidemiology of a prion  
590 disease in mule deer population units. *Ecological Applications*, 14, 1870–1881.
- 591 Craft, M.E. (2015). Infectious disease transmission and contact networks in wildlife and livestock.  
592 *Philosophical Transactions of the Royal Society B*, 370, 20140107.
- 593 Craft, M.E. & Caillaud, D. (2011). Network models: an underutilized tool in wildlife epidemi-  
594 ology? *Interdisciplinary Perspectives on Infectious Diseases*, 2011.
- 595 Craft, M.E., Volz, E., Packer, C., & Meyers, L.A. (2011). Disease transmission in territorial pop-  
596 ulations: the small-world network of Serengeti lions. *Journal of the Royal Society Interface*,  
597 8, 776–786.
- 598 Cross, P.C., Almberg, E.S., Haase, C.G., Hudson, P.J., Maloney, S.K., Metz, M.C. *et al.* (2016).  
599 Energetic costs of mange in wolves estimated from infrared thermography. *Ecology*, 97,  
600 1938–1948.
- 601 Cross, P.C., Lloyd-Smith, J.O., & Getz, W.M. (2005). Disentangling association patterns in  
602 fission–fusion societies using African buffalo as an example. *Animal Behaviour*, 69, 499–  
603 506.
- 604 Davis, S., Abbasi, B., Shah, S., Telfer, S., & Begon, M. (2015). Spatial analyses of wildlife  
605 contact networks. *Journal of the Royal Society Interface*, 12, 20141004.
- 606 Dion, E., VanSchalkwyk, L., & Lambin, E.F. (2011). The landscape epidemiology of foot-  
607 and-mouth disease in South Africa: A spatially explicit multi-agent simulation. *Ecological*  
608 *Modelling*, 222, 2059–2072.
- 609 Dougherty, E.R., Carlson, C.J., Blackburn, J.K., & Getz, W.M. (2017). A cross-validation-based  
610 approach for delimiting reliable home range estimates. *Movement Ecology*, 5, 19.
- 611 Edelhoff, H., Signer, J., & Balkenhol, N. (2016). Path segmentation for beginners: an overview  
612 of current methods for detecting changes in animal movement patterns. *Movement Ecology*,  
613 4, 21.
- 614 Ezenwa, V.O., Ghai, R.R., McKay, A.F., & Williams, A.E. (2016). Group living and pathogen  
615 infection revisited. *Current Opinion in Behavioral Sciences*, 12, 66–72.
- 616 Farine, D.R. (2017). A guide to null models for animal social network analysis. *Methods in*  
617 *Ecology and Evolution*.
- 618 Farine, D.R. & Whitehead, H. (2015). Constructing, conducting and interpreting animal social  
619 network analysis. *Journal of Animal Ecology*, 84, 1144–1163.
- 620 Farnsworth, M.L., Hoeting, J.A., Hobbs, N.T., & Miller, M.W. (2006). Linking chronic wast-  
621 ing disease to mule deer movement scales: a hierarchical Bayesian approach. *Ecological*  
622 *Applications*, 16, 1026–1036.
- 623 Filatova, T., Verburg, P.H., Parker, D.C., & Stannard, C.A. (2013). Spatial agent-based models  
624 for socio-ecological systems: challenges and prospects. *Environmental modelling & software*,  
625 45, 1–7.
- 626 Fryxell, J.M., Hazell, M., Börger, L., Dalziel, B.D., Haydon, D.T., Morales, J.M. *et al.* (2008).  
627 Multiple movement modes by large herbivores at multiple spatiotemporal scales. *Proceedings*  
628 *of the National Academy of Sciences*, 105, 19114–19119.
- 629 Getz, W.M. (2013). Computational population biology: linking the inner and outer worlds of  
630 organisms. *Israel Journal of Ecology & Evolution*, 59, 2–16.



- 631 Getz, W.M., Marshall, C.R., Carlson, C.J., Giuggioli, L., Ryan, S.J., Romañach, S.S. *et al.*  
632 (2017). Making ecology models adequate. *Ecology Letters*, pp in press.
- 633 Getz, W.M., Salter, R., Lyons, A.J., & Sippl-Swezey, N. (2015). Panmictic and clonal evolution  
634 on a single patchy resource produces polymorphic foraging guilds. *PloS one*, 10, e0133732.
- 635 Getz, W.M. & Saltz, D. (2008). A framework for generating and analyzing movement paths on  
636 ecological landscapes. *Proceedings of the National Academy of Sciences*, 105, 19066–19071.
- 637 Grimm, V., Revilla, E., Berger, U., Jeltsch, F., Mooij, W.M., Railsback, S.F. *et al.* (2005).  
638 Pattern-oriented modeling of agent-based complex systems: lessons from ecology. *science*,  
639 310, 987–991.
- 640 Gurarie, E., Andrews, R.D., & Laidre, K.L. (2009). A novel method for identifying behavioural  
641 changes in animal movement data. *Ecology Letters*, 12, 395–408.
- 642 Gurarie, E., Bracis, C., Delgado, M., Meckley, T.D., Kojola, I., & Wagner, C.M. (2016). What is  
643 the animal doing? Tools for exploring behavioural structure in animal movements. *Journal*  
644 *of Animal Ecology*, 85, 69–84.
- 645 Gutenkunst, R., Newlands, N., Lutcavage, M., & Edelstein-Keshet, L. (2007). Inferring resource  
646 distributions from Atlantic bluefin tuna movements: An analysis based on net displacement  
647 and length of track. *Journal of Theoretical Biology*, 245, 243–257.
- 648 Hamede, R.K., Bashford, J., McCallum, H., & Jones, M. (2009). Contact networks in a wild  
649 Tasmanian devil (*Sarcophilus harrisii*) population: using social network analysis to reveal  
650 seasonal variability in social behaviour and its implications for transmission of devil facial  
651 tumour disease. *Ecology Letters*, 12, 1147–1157.
- 652 Hartig, F., Calabrese, J.M., Reineking, B., Wiegand, T., & Huth, A. (2011). Statistical inference  
653 for stochastic simulation models—theory and application. *Ecology letters*, 14, 816–827.
- 654 Hoyer, I.J., Blosser, E.M., Acevedo, C., Thompson, A.C., Reeves, L.E., & Burkett-Cadena,  
655 N.D. (2017). Mammal decline, linked to invasive Burmese python, shifts host use of vector  
656 mosquito towards reservoir hosts of a zoonotic disease. *Biology letters*, 13, 20170353.
- 657 Jones, K.E., Patel, N.G., Levy, M.A., Storeygard, A., Balk, D., Gittleman, J.L. *et al.* (2008).  
658 Global trends in emerging infectious diseases. *Nature*, 451, 990–993.
- 659 Kays, R., Crofoot, M.C., Jetz, W., & Wikelski, M. (2015). Terrestrial animal tracking as an eye  
660 on life and planet. *Science*, 348, aaa2478.
- 661 Keeling, M.J. & Rohani, P. (2008). *Modeling Infectious Diseases in Humans and Animals*.  
662 Princeton University Press.
- 663 Kissling, D.W., Pattemore, D.E., & Hagen, M. (2014). Challenges and prospects in the telemetry  
664 of insects. *Biological Reviews*, 89, 511–530.
- 665 Kucharski, A.J. & Edmunds, W.J. (2015). Characterizing the transmission potential of zoonotic  
666 infections from minor outbreaks. *PLoS Computational Biology*, 11, e1004154.
- 667 Lafferty, K.D. (2017). Marine Infectious Disease Ecology. *Annual Review of Ecology, Evolution,*  
668 *and Systematics*, 48, 473–496.
- 669 Larsen, L.G., Eppinga, M.B., Passalacqua, P., Getz, W.M., Rose, K.A., & Liang, M. (2016).  
670 Appropriate complexity landscape modeling. *Earth-Science Reviews*, 160, 111–130.



- 671 Leach, C.B., Webb, C.T., & Cross, P.C. (2016). When environmentally persistent pathogens  
672 transform good habitat into ecological traps. *Royal Society open science*, 3, 160051.
- 673 Leclerc, M., Vander Wal, E., Zedrosser, A., Swenson, J.E., Kindberg, J., & Pelletier, F. (2016).  
674 Quantifying consistent individual differences in habitat selection. *Oecologia*, 180, 697–705.
- 675 Lloyd-Smith, J.O., Cross, P.C., Briggs, C.J., Daugherty, M., Getz, W.M., Latto, J. *et al.* (2005a).  
676 Should we expect population thresholds for wildlife disease? *Trends in Ecology & Evolution*,  
677 20, 511–519.
- 678 Lloyd-Smith, J.O., Schreiber, S.J., Kopp, P.E., & Getz, W.M. (2005b). Superspreading and the  
679 effect of individual variation on disease emergence. *Nature*, 438, 355–359.
- 680 Long, J.A. & Nelson, T.A. (2013). A review of quantitative methods for movement data. *Inter-*  
681 *national Journal of Geographical Information Science*, 27, 292–318.
- 682 Lyons, A.J., Turner, W.C., & Getz, W.M. (2013). Home range plus: a space-time characteriza-  
683 tion of movement over real landscapes. *Movement Ecology*, 1, 2.
- 684 Manly, B., McDonald, L., Thomas, D., McDonald, T.L., & Erickson, W.P. (2002). *Resource*  
685 *selection by animals: statistical design and analysis for field studies*. Kluwer.
- 686 Marsh, M.K., Hutchings, M.R., McLeod, S.R., & White, P.C. (2011). Spatial and temporal  
687 heterogeneities in the contact behaviour of rabbits. *Behavioral ecology and sociobiology*, 65,  
688 183–195.
- 689 McCallum, H., Fenton, A., Hudson, P.J., Lee, B., Levick, B., Norman, R. *et al.* (2017). Break-  
690 ing beta: deconstructing the parasite transmission function. *Phil. Trans. R. Soc. B*, 372,  
691 20160084.
- 692 McClintock, B.T., London, J.M., Cameron, M.F., & Boveng, P.L. (2017). Bridging the gaps  
693 in animal movement: hidden behaviors and ecological relationships revealed by integrated  
694 data streams. *Ecosphere*, 8.
- 695 McNaughton, S. (1988). Mineral nutrition and spatial concentrations of African ungulates.  
696 *Nature*, 334, 343–345.
- 697 Morris, L.R., Proffitt, K.M., Asher, V., & Blackburn, J.K. (2016). Elk resource selection and  
698 implications for anthrax management in Montana. *Journal of Wildlife Management*, 80,  
699 235–244.
- 700 Mullins, J.C., Garofolo, G., Van Ert, M., Fasanella, A., Lukhnova, L., Hugh-Jones, M.E. *et al.*  
701 (2013). Ecological niche modeling of *Bacillus anthracis* on three continents: evidence for  
702 genetic-ecological divergence? *PloS one*, 8, e72451.
- 703 Murray, M., Edwards, M.A., Abercrombie, B., & St. Clair, C.C. (2015). Poor health is associated  
704 with use of anthropogenic resources in an urban carnivore. *Proceedings of the Royal Society*  
705 *of London B: Biological Sciences*, 282.
- 706 Nathan, R., Getz, W.M., Revilla, E., Holyoak, M., Kadmon, R., Saltz, D. *et al.* (2008). A  
707 movement ecology paradigm for unifying organismal movement research. *Proceedings of the*  
708 *National Academy of Sciences*, 105, 19052–19059.
- 709 Nathan, R., Spiegel, O., Fortmann-Roe, S., Harel, R., Wikelski, M., & Getz, W.M. (2012). Using  
710 tri-axial acceleration data to identify behavioral modes of free-ranging animals: general  
711 concepts and tools illustrated for griffon vultures. *Journal of Experimental Biology*, 215,  
712 986–996.

- 713 Parsons, M.B., Gillespie, T.R., Lonsdorf, E.V., Travis, D., Lipende, I., Gilagiza, B. *et al.* (2014).  
714 Global positioning system data-loggers: a tool to quantify fine-scale movement of domestic  
715 animals to evaluate potential for zoonotic transmission to an endangered wildlife population.  
716 *PLoS one*, 9, e110984.
- 717 Paull, S.H., Song, S., McClure, K.M., Sackett, L.C., Kilpatrick, A.M., & Johnson, P.T. (2012).  
718 From superspreaders to disease hotspots: linking transmission across hosts and space. *Frontiers in Ecology and the Environment*, 10, 75–82.  
719
- 720 Perkins, S.E., Cagnacci, F., Stradiotto, A., Arnoldi, D., & Hudson, P.J. (2009). Comparison  
721 of social networks derived from ecological data: implications for inferring infectious disease  
722 dynamics. *Journal of Animal Ecology*, 78, 1015–1022.
- 723 Perkins, T.A., Scott, T.W., Le Menach, A., & Smith, D.L. (2013). Heterogeneity, mixing, and  
724 the spatial scales of mosquito-borne pathogen transmission. *PLoS Computational Biology*,  
725 9, e1003327.
- 726 Porphyre, T., Stevenson, M., Jackson, R., & McKenzie, J. (2008). Influence of contact het-  
727 erogeneity on TB reproduction ratio  $R_0$  in a free-living brushtail possum *Trichosurus*  
728 *vulpecula* population. *Veterinary Research*, 39, 1.
- 729 Pruvot, M., Lejeune, M., Kutz, S., Hutchins, W., Musiani, M., Massolo, A. *et al.* (2016).  
730 Better Alone or in Ill Company? The Effect of Migration and Inter-Species Comingling  
731 on *Fascioloides magna* Infection in Elk. *PLoS one*, 11, e0159319.
- 732 Ragg, J. & Moller, H. (2000). Microhabitat selection by feral ferrets (*Mustela furo*) in a pastoral  
733 habitat, East Otago, New Zealand. *New Zealand Journal of Ecology*, pp 39–46.
- 734 Raichlen, D.A., Wood, B.M., Gordon, A.D., Mabulla, A.Z., Marlowe, F.W., & Pontzer, H.  
735 (2014). Evidence of Lévy walk foraging patterns in human hunter–gatherers. *Proceedings*  
736 *of the National Academy of Sciences*, 111, 728–733.
- 737 Roy, H., Steinkraus, D., Eilenberg, J., Hajek, A., & Pell, J. (2006). Bizarre interactions and  
738 endgames: entomopathogenic fungi and their arthropod hosts. *Annual Review Entomology*,  
739 51, 331–357.
- 740 Rózsa, L., Rékási, J., & Reiczigel, J. (1996). Relationship of host coloniality to the population  
741 ecology of avian lice (Insecta: Phthiraptera). *Journal of Animal Ecology*, pp 242–248.
- 742 Ryan, S.J., Jones, J.H., & Dobson, A.P. (2013). Interactions between social structure, demog-  
743 raphy, and transmission determine disease persistence in primates. *PLoS One*, 8, e76863.
- 744 Sah, P., Leu, S.T., Cross, P.C., Hudson, P.J., & Bansal, S. (2017a). Unraveling the disease  
745 consequences and mechanisms of modular structure in animal social networks. *Proceedings*  
746 *of the National Academy of Sciences*, pp 201613616.
- 747 Sah, P., Méndez, J.D., Mann, J., & Bansal, S. (2017b). Disease implications of animal social  
748 organization and network structure—a quantitative analysis. *bioRxiv*, pp 106633.
- 749 Seidel, D.P. & Boyce, M.S. (2015). Patch-use dynamics by a large herbivore. *Movement Ecology*,  
750 3, 7.
- 751 Shepard, E.L., Wilson, R.P., Quintana, F., Laich, A.G., Liebsch, N., Albareda, D.A. *et al.*  
752 (2008). Identification of animal movement patterns using tri-axial accelerometry. *Endan-*  
753 *gered Species Research*, 10, 47–60.

- 754 Sih, A., Spiegel, O., Godfrey, S., Leu, S., & Bull, C.M. (2017). Integrating social networks,  
755 animal personalities, movement ecology and parasites: a framework with examples from a  
756 lizard. *Animal Behaviour*.
- 757 Silk, M.J., Croft, D.P., Delahay, R.J., Hodgson, D.J., Boots, M., Weber, N. *et al.* (2017a). Using  
758 Social Network Measures in Wildlife Disease Ecology, Epidemiology, and Management.  
759 *BioScience*, 67, 245–257.
- 760 Silk, M.J., Croft, D.P., Delahay, R.J., Hodgson, D.J., Weber, N., Boots, M. *et al.* (2017b).  
761 The application of statistical network models in disease research. *Methods in Ecology and*  
762 *Evolution*.
- 763 Spiegel, O., Harel, R., Centeno-Cuadros, A., Hatzofe, O., Getz, W.M., & Nathan, R. (2015a).  
764 Moving beyond curve fitting: using complementary data to assess alternative explanations  
765 for long movements of three vulture species. *The American Naturalist*, 185, E44–E54.
- 766 Spiegel, O., Leu, S.T., Bull, C.M., & Sih, A. (2017a). What’s your move? Movement as a link  
767 between personality and spatial dynamics in animal populations. *Ecology Letters*, 20, 3–18.
- 768 Spiegel, O., Leu, S.T., Sih, A., & Bull, C.M. (2016). Socially interacting or indifferent neigh-  
769 bours? Randomization of movement paths to tease apart social preference and spatial  
770 constraints. *Methods in Ecology and Evolution*, 7, 971–979.
- 771 Spiegel, O., Leu, S.T., Sih, A., Godfrey, S.S., & Bull, C.M. (2015b). When the going gets  
772 tough: behavioural type-dependent space use in the sleepy lizard changes as the season  
773 dries. *Proceedings of the Royal Society of London B: Biological Sciences*, 282, 20151768.
- 774 Spiegel, O., Sih, A., Leu, S.T., & Bull, C.M. (2017b). Where should we meet? Mapping social  
775 network interactions of sleepy lizards shows sex-dependent social network structure. *Animal*  
776 *Behaviour*.
- 777 Tracey, J.A., Bevins, S.N., VandeWoude, S., & Crooks, K.R. (2014). An agent-based movement  
778 model to assess the impact of landscape fragmentation on disease transmission. *Ecosphere*,  
779 5, 1–24.
- 780 Van Moorter, B., Rolandsen, C.M., Basille, M., & Gaillard, J.M. (2016). Movement is the glue  
781 connecting home ranges and habitat selection. *Journal of Animal Ecology*, 85, 21–31.
- 782 Van Moorter, B., Visscher, D.R., Jerde, C.L., Frair, J.L., & Merrill, E.H. (2010). Identifying  
783 movement states from location data using cluster analysis. *Journal of Wildlife Management*,  
784 74, 588–594.
- 785 Van Winkle, W. (1975). Comparison of several probabilistic home-range models. *Journal of*  
786 *Wildlife Management*, pp 118–123.
- 787 Webb, N.F., Hebblewhite, M., & Merrill, E.H. (2008). Statistical methods for identifying wolf  
788 kill sites using global positioning system locations. *Journal of Wildlife Management*, 72,  
789 798–807.
- 790 Weber, N., Carter, S.P., Dall, S.R., Delahay, R.J., McDonald, J.L., Bearhop, S. *et al.* (2013).  
791 Badger social networks correlate with tuberculosis infection. *Current Biology*, 23, R915–  
792 R916.
- 793 Weber, T.P. & Stilianakis, N.I. (2008). Inactivation of influenza A viruses in the environment  
794 and modes of transmission: a critical review. *Journal of Infection*, 57, 361–373.

- 795 White, L.A., Forester, J.D., & Craft, M.E. (2017). Using contact networks to explore mechanisms  
796 of parasite transmission in wildlife. *Biological Reviews*, 92, 389–409.
- 797 Williams, D.M., Quinn, A.C.D., & Porter, W.F. (2014). Informing disease models with temporal  
798 and spatial contact structure among GPS-collared individuals in wild populations. *PloS*  
799 *One*, 9, e84368.
- 800 Wilmers, C.C., Nickel, B., Bryce, C.M., Smith, J.A., Wheat, R.E., & Yovovich, V. (2015). The  
801 golden age of bio-logging: how animal-borne sensors are advancing the frontiers of ecology.  
802 *Ecology*, 96, 1741–1753.
- 803 Wilson, R.P., Grundy, E., Massy, R., Soltis, J., Tysse, B., Holton, M. *et al.* (2014). Wild state  
804 secrets: ultra-sensitive measurement of micro-movement can reveal internal processes in  
805 animals. *Frontiers in Ecology and the Environment*, 12, 582–587.
- 806 Wittemyer, G., Polansky, L., Douglas-Hamilton, I., & Getz, W.M. (2008). Disentangling the  
807 effects of forage, social rank, and risk on movement autocorrelation of elephants using  
808 Fourier and wavelet analyses. *Proceedings of the National Academy of Sciences*, 105, 19108–  
809 19113.
- 810 Woodroffe, R. & Donnelly, C.A. (2011). Risk of contact between endangered African wild dogs  
811 *Lycaon pictus* and domestic dogs: opportunities for pathogen transmission. *Journal of*  
812 *applied ecology*, 48, 1345–1354.
- 813 Woodroffe, R., Donnelly, C.A., Jenkins, H.E., Johnston, W.T., Cox, D.R., Bourne, F.J. *et al.*  
814 (2006). Culling and cattle controls influence tuberculosis risk for badgers. *Proceedings of*  
815 *the National Academy of Sciences*, 103, 14713–14717.
- 816 Worton, B.J. (1989). Kernel methods for estimating the utilization distribution in home-range  
817 studies. *Ecology*, 70, 164–168.
- 818 Yockney, I., Nugent, G., Latham, M., Perry, M., Cross, M., & Byrom, A. (2013). Comparison  
819 of ranging behaviour in a multi-species complex of free-ranging hosts of bovine tuberculosis  
820 in relation to their use as disease sentinels. *Epidemiology & Infection*, 141, 1407–1416.
- 821 Zidon, R., Garti, S., Getz, W.M., & Saltz, D. (2017). Zebra migration strategies and anthrax in  
822 Etosha National Park, Namibia. *Ecosphere*, 8.

823 **Figures**

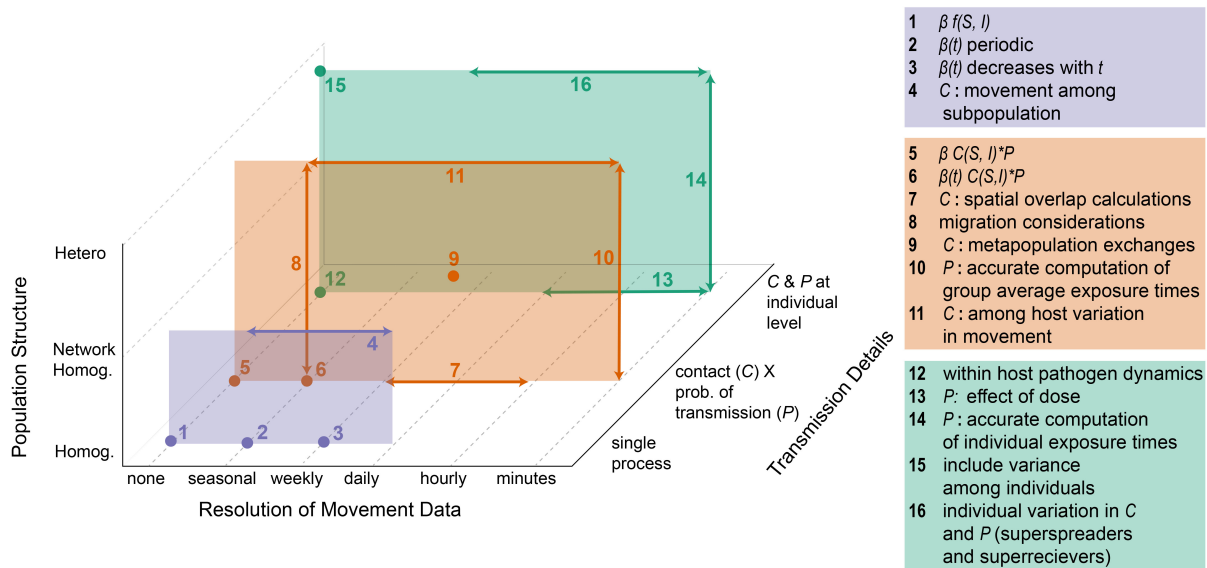

**Figure 1: A Movement-Focused Modeling Space in Epidemiology.** Incorporation of movement at different temporal scales can be used to address pathogen transmission-related questions at three levels (vertical colored planes). Transmission can be treated either as a single process (as commonly done in SIR models, where  $S$  are susceptible,  $I$  infectious and  $R$  removed individuals—see Box 1; purple plane), a concatenation of a contact process  $C$  and probability  $P$  of pathogen transmission during contact averaged over individuals (orange plane), or implemented at an individual level (green plane). In addition, transmission can be considered to occur within a homogeneous population, a network of homogeneous groups or subpopulations (metapopulation), or a spatially continuous heterogeneous population. Each labeled dot indicates a unique level of complexity that can be incorporated into the transmission process, while the spanning arrows imply that additional complexity can be incorporated at several different temporal scales (horizontal arrows) and population-structures (vertical arrows).

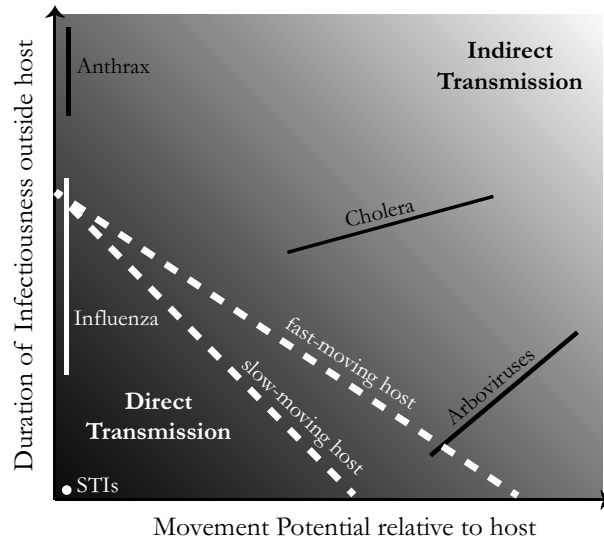

Figure 2: **The Transmission Continuum.** Transmission mechanisms vary across a continuous spectrum. The classification of a particular pathogen or parasite in a given system depends on the movement potential of pathogens relative to their hosts and the ability of pathogens to remain infectious outside hosts. Those pathogens that require two agents to interact directly for successful transmission, often via a specific behavior, such as sexually transmitted infections (STIs), are an unambiguous example of a directly transmitted disease and represented by a point. Pathogens that transmit successfully over a broader set of conditions, such as influenza or arboviruses, are represented conceptually across the gradient as a line and might vary across one or both of the axes. Along this spectrum, we have determined a somewhat subjective threshold between what we describe as *Direct transmission* and *Indirect transmission*, visualized by the white dashed lines. Even within the same pathogen taxon (and thus, the same characteristic duration of infectiousness), this threshold could shift along this gradient depending on the relative speed of host movement.



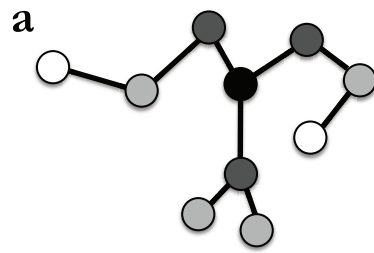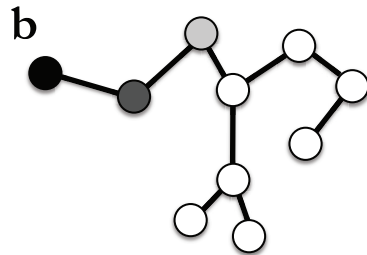

Edge Density = 0.2

| Metric           | a  | b  | Mean |
|------------------|----|----|------|
| Degree           | 3  | 1  | 1.6  |
| Path Length      | 17 | 35 | 26.2 |
| Node Betweenness | 60 | 0  | ---  |

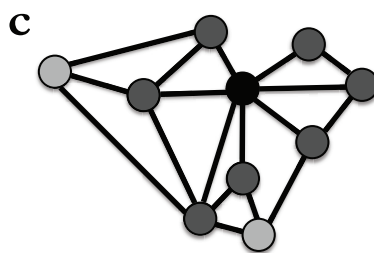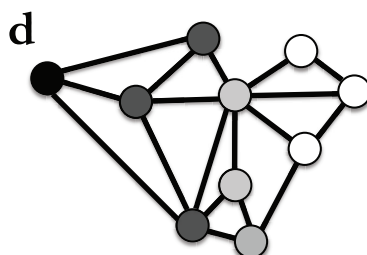

Edge Density = 0.4

| Metric           | c  | d  | Mean |
|------------------|----|----|------|
| Degree           | 7  | 3  | 3.6  |
| Path Length      | 11 | 18 | 16.3 |
| Node Betweenness | 40 | 0  | ---  |

**Figure 3: Networks for Disease Research.**

Network analyses can serve to identify particular contact network structures that might be conducive to disease spread through a population and identify individuals within networks that make disproportionate contributions to the transmission of a disease (Ryan *et al.* 2013). A network with relatively low edge density and high path lengths might prevent a directly transmitted parasite (or pathogen) from spreading through a population (networks **a** and **b**). Contrastingly, a network with high edge density and low path length could facilitate parasite spread through a population (networks **c** and **d**). In addition, the position of the first infected individual (shaded in black) in a network might facilitate or inhibit a parasite from spreading. Individuals with relatively high degree or node betweenness could be super-spreaders (networks **a** and **c**), whereas individuals positioned at the periphery of a network, with lower degree and node betweenness, might cause transmission to fade out (networks **b** and **d**). At both the population and individual levels, these network characteristics depend on resource distribution, social relationships, and ultimately, the movement behaviors that arise from both. It should also be noted that the same general principles would apply if this schematic were imagined as a spatial network instead of a contact network, with nodes representing locations rather than individuals.



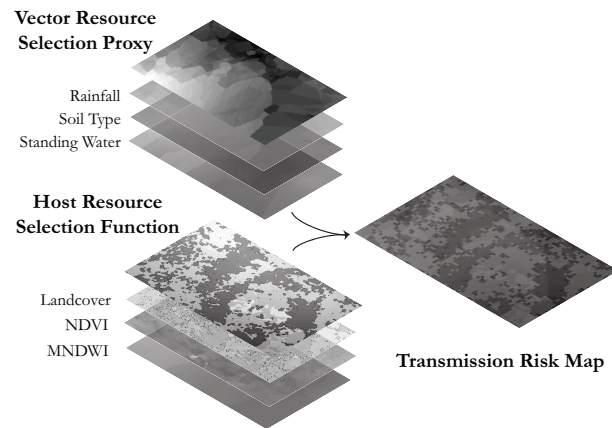

**Figure 4: Calculating Spatial Risk from Movement Data.** For vectors with known associations to abiotic covariates, resource selection functions can be a powerful tool to identify areas of overlap with host movement and map areas of increased exposure risk. In this hypothetical example of an arbovirus, maps of resource selection or association (the top layer of each stack) are derived for a terrestrial host and a water-dependent vector from associated environmental layers (e.g., land cover or soil type) and movement or presence data. Combined, these maps of resource selection can produce a map of overall transmission risk. Alternatively, a similar approach could be used with a pathogen, such as anthrax, that relies on mappable soil characteristics, such as calcium levels and pH (Mullins *et al.* 2013). The other layer would correspond with host habitat preferences, including indicators of watering hole locations (i.e., Mean Normalized Difference Water Index; MNDWI) and graze or browse quality (i.e., Normalized Difference Vegetation Index; NDVI).

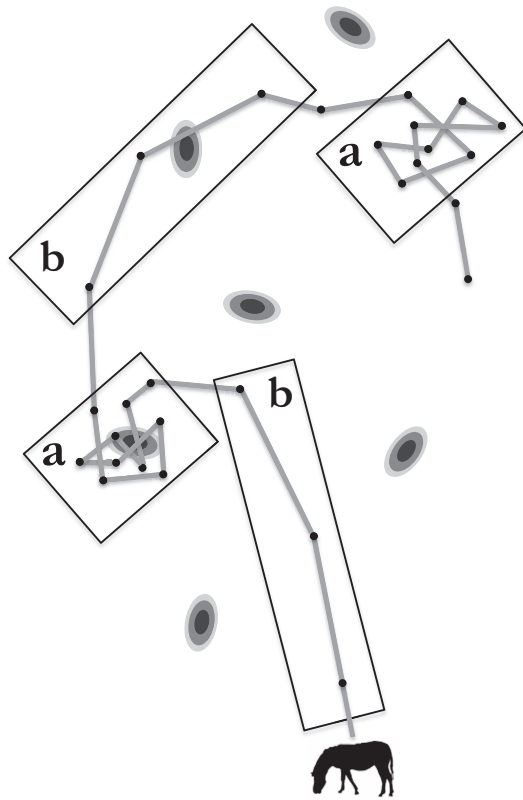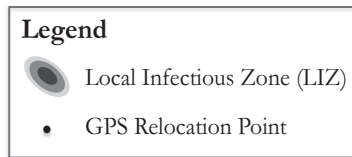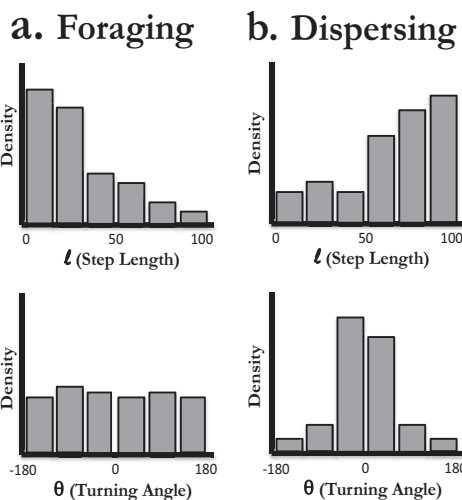

Figure 5: **Canonical Activity Modes (CAMs) from Movement Data.**

Several alternative methods enable a researcher to infer different canonical activity modes (CAMs; thematic mixes of behavioral states). In this schematic, a hypothetical trajectory of a zebra can be easily divided into a foraging CAM (boxes labeled **a**), defined by relatively small step lengths and an almost uniform distribution of turning angles, and a dispersing CAM (boxes labeled **b**), defined by relatively larger step lengths and a distribution of turning angles with a low variance. For disease research, if a pathogen is known to have environmental reservoirs with predictable locations (e.g., due to its dependence on certain soil types or pH), the CAM during which the animal is susceptible (in this case, foraging, when the zebra eats plants or soil harboring the bacterium) can be isolated to identify the areas or times of greatest risk. One can also identify individuals or classes (e.g., sex or age groups) who could be at greater risk than others due to the higher proportion of time they spend foraging in their activity budgets. In this specific example, the host is at low risk of transmission from the LIZ in box **b** and at high risk from the LIZ in **a** due to the different behavioral states. The gray lines between GPS relocation points represent estimated paths between known locations rather than an exact trajectory.

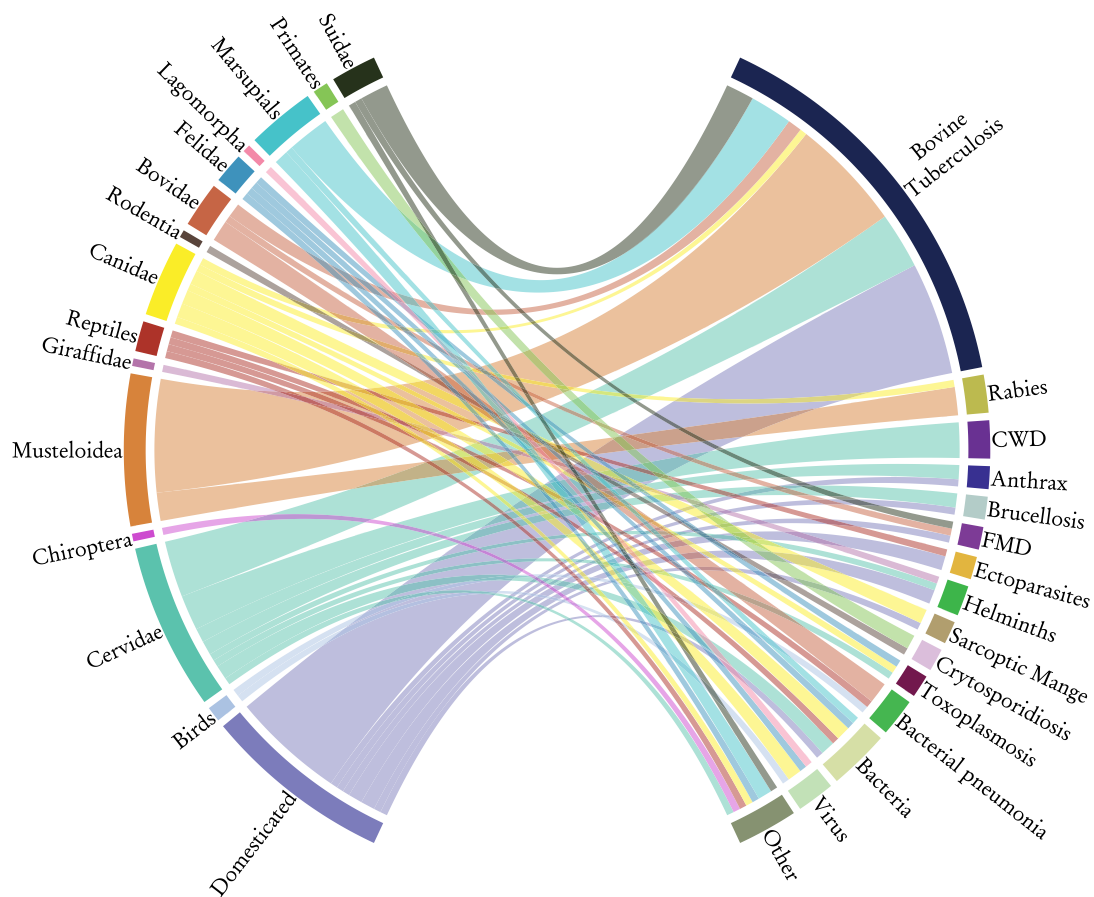

**Figure 6: Study Bias in Movement & Disease Ecology Literature.** We performed a systematic review of scientific literature, identifying 70 studies currently using movement data and methods within disease research since 2000. In the above chord diagram, the host taxonomic order (left) is linked with the associated pathogen or parasite taxon (right), with the width of the bar indicating the proportion of studies investigating that particular pairing. Expectedly, pathogens with possible spillover threats to humans or livestock receive most of the attention. For example, studies of bovine tuberculosis (*Mycobacterium tuberculosis*) systems were particularly prevalent in the literature, likely because of the risk faced by cattle in proximity to possums, raccoons, badgers, and other mammals. Other well studied pairings included bighorn sheep with bacterial pneumonia (*Mycoplasma ovipneumoniae*); raccoons and canines with rabies; and deer with various livestock spillover diseases, such as anthrax (*Bacillus anthracis*), brucellosis (*Brucella abortus*), foot and mouth disease (FMD; *Aphthae epizooticae*), and chronic wasting disease (CWD).

### Box 1. A Disease Ecology Primer

Disease ecology as a discipline is conventionally focused on understanding the ecological drivers of *epidemiological* dynamics, referring to the study of the occurrence, distribution, and control of disease. Whereas epidemiology conventionally focuses on human disease (including non-infectious causes of morbidity and mortality), wildlife epidemiology, and more broadly disease ecology, take a systems perspective on drivers of *infectious diseases*, those which are contagious within a population. Infectious diseases are spread by a *pathogen*, perhaps the most generic term for a bacterium, virus, or other infectious agent (microorganism or *prion*) that can cause disease. Pathogens also include *parasites*, a term defined ecologically that includes organisms that live in (*endoparasites*) or on (*ectoparasites*) another organism—its *host*—and benefit by deriving nutrients at the host's expense. Not all parasites are immediately pathogenic (i.e., disease-causing). Some, such as ticks, could instead be the *vectors* that spread infectious agents, such as the bacterium that causes Lyme disease. Pathogens and parasites are spread by some process of *shedding*, the release of pathogenic material from a host either through passive emission (e.g., HIV in semen) or actively-induced emission when the life cycle of a parasite requires its own ejection from the host (e.g., aerosolization through coughing and sneezing or the fecal release of tapeworm eggs from a host). Some hosts, termed *super-spreaders*, can be particularly active shedders and infect disproportionately more susceptible individuals than other hosts do. In cases where shedding reaches a new host and this *exposure* event leads to infection, this produces an *effective contact*; what is considered an effective contact will vary with the mode of transmission of the pathogen in question.

824

In both humans and wildlife, outbreak dynamics are most readily modeled using a mathematical *compartmental systems* framework: after dividing the population into epidemiologically-relevant compartments (*viz.*, susceptible: S, infected: I, and recovered: R), difference or ordinary differential equations are used to describe the transitions of individuals between the disease classes over time. Typically these models make an assumption of *spatial homogeneity*, *random contact* among individuals, and *rapid mixing* of individuals within compartments. The course of infection is typically summarized for populations either via an *incidence* (the rate at which new cases arise), or *prevalence* (the proportion of the population infected) curve. If at least a low level of prevalence is maintained at all times, a disease is considered *endemic*. In contrast, an *epidemic* starts from a handful of introduced or new *index cases* and spreads throughout a susceptible population as an *outbreak*, before burning itself out. The latter occurs because the proportion of susceptible individuals in the population has either dropped below a *threshold density* or individuals have altered their behavior to avoid contact with infected individuals. When an epidemic is truly global (defined by infection across multiple continents), it is referred to as a *pandemic*. In wildlife, *epizootic* and *enzootic* serve as parallel terms to epidemic and endemic. Diseases that originate in wildlife and spread to humans are termed *zoonoses*, and are conventionally of special interest in disease ecology. The process of *spillover* of zoonotic disease into human populations is complex, and often poorly understood due to the complexities of human-wildlife contact. Conversely, *spillback* refers to the process by which a zoonotic disease is introduced by humans into novel animal host populations (whether domesticated or wild).

## Box 2. A Movement Ecology Primer

Movement ecology has developed as a field that draws on *telemetry data* to explore the causes, mechanisms, and patterns of animal movement, as well as understand its consequences on the ecology and evolution of individuals, populations, and communities. *Telemetry* refers to the process of transmitting and recording the positions of an animal, and represents the primary means of detecting animal movements. Early telemetry research relied upon *Very High Frequency* (VHF) radio signals to triangulate the positions of *collared* or *radiotagged* individuals. The individual positional fixes obtained can be referred to as *relocations*, and when treated consecutively, they are often called a *trajectory* or *path*. The relatively coarse temporal resolution of most relocation data from classical radiotagging methods limits the ability of movement ecologists to observe and differentiate among *fundamental movement elements* (FMEs; e.g., a walking versus trotting step) that make up the movement path of an individual. However, the relatively infrequent or irregular fixes emerging from such devices can still be used to evaluate patterns of *space use* and *habitat selection*. For example, even coarse movement data can aid in characterizing the manner in which an animal utilizes its *home range*, which represents the area it traverses in its daily activities of foraging, mating, and caring for young. These areas have been delimited in a number of ways, including: *minimum convex polygon* (MCP) methods, which simply construct a boundary around the outermost points of a trajectory; and *utilization distribution* (UD) methods, which offer more information regarding the frequency of space use within the home range. Recently, alternative methods that more explicitly account for the temporal component of movement data have been proposed, including the *time-local convex hull* (T-LoCoH) method and *Brownian bridges*, among several others. Even with sparse datasets, these methods are expected to create meaningful generalizations of space use and can form the basis of *spatial overlap* analyses that aim to determine the level of shared space use among monitored individuals. Several methods for understanding individual and population level habitat selection, such as *resource-selection functions* (RSFs), can also be used with relatively coarse movement data. These methods aim to identify the habitat types that an animal prefers, indicated by disproportionately greater use of a habitat than expected based on its availability on the landscape, and create predictive maps of space use.

825

Today, the majority of movement ecology research depends upon more advanced satellite technology, referred to broadly as *Global Positioning Systems* (GPS), to record animal locations at finer spatial and temporal resolutions. Even with this technology, consecutive relocations typically span a mix of FMEs. Nonetheless, a variety of summary metrics can be used to describe the path, the most basic of which are the *step length* (the Euclidean distance between consecutive relocations) and *turning angle* (the angle of one step relative to the step immediately prior). The higher resolution relocations can also enable *behavioral analyses*, which often rely on *path segmentation* methods to split a movement trajectory into segments that look quantitatively similar (often based on those simple summary metrics). Such analyses can help determine the *behavioral state* of an individual at specific points in time. These states occur at coarser time scales than FMEs, but represent short-lived phenomena that can be inferred from GPS data. Similar analyses can allow for the clustering of longer sequences of behavioral states that are considered collectively as *canonical activity modes* (CAMs; e.g., resting or foraging), which are also readily observable in modern telemetry data. For example, foraging is a CAM that often consists of a variety of behaviors, including searching, eating, and perhaps vigilance, among others. A full movement path, however, often consists of a series of CAMs, and *movement syndromes* are used to describe movement patterns at the scale of an entire trajectory, enabling discrimination among types of individuals (e.g., territorial versus nomadic individuals). With recent technological advances to the telemetry units worn by animals, supplementary data sets, such as those obtained using *accelerometers* that measure changes in velocity in three-dimensions, have enabled the evaluation of movement behaviors at even finer spatiotemporal scales, getting researchers closer to observing FMEs. Similarly, the advent of *proximity sensors*, which record when two collared animals are within a specified distance of one another, has allowed researchers additional insight into the *spatial proximity* of monitored individuals. These data can be used to inform *contact networks*, which map the associations among individuals in a population.

### Box 3. Balancing Scales: Simultaneous Modeling of Movement and Epidemiological Processes

Deciding on a spatiotemporal scale for epidemiological models is usually a function of the timescales of host and pathogen processes, including temporal aspects of transmission like latency, persistence in the environment, or replication rates during early infection. The rates of biological processes might not map directly onto the models we build, if the temporal scale of data is necessarily coarser due to the resolution of available movement data. However, some of the greatest successes of movement ecology have involved explicit model formulation with attention to spatiotemporal resolution of processes (Lyons *et al.* 2013), potentially offering a template for integrated work. We outline some brief guidelines:

**Space pixel.** The corresponding spatial resolution  $S$  is related to time through the diffusion relationship:

$$\Delta S = \delta(\Delta t)^{1/2}$$

This is where movement comes in:  $\delta$  is a movement diffusion constant estimated from empirical data and will vary among organism types. An alternative approach is to use a velocity relationship:

$$\Delta S = v\Delta t$$

for organisms that mainly execute directed movement at average velocity  $v$  at fine time scales. Since empirical tracking data has repeatedly shown that movements of animals (and humans) are often super diffuse, we suggest that former approach as generally more favorable (Raichlen *et al.* 2014; Spiegel *et al.* 2015a).

**Coarse graining.** Going from the scale of individual transmission upwards to emergent processes like landscape structure, epidemic wavefronts, or even range shifts requires proportionally aggregating data and model structure, a process typically termed *coarse graining*. There are various levels of coarse graining, each representing close to a one magnitude of size step up. Coarse graining requires aggregating over a union of pixels, using an appropriate integral kernel. Integral kernels can take several forms including the bounded uniform, truncated Gaussian, or other more idiosyncratic choices. Optimal kernel choice can be guided by wavelet analysis of movement data.

**Time pixel.** The minimum time resolution should be based on some fraction of the most fundamental cycle pertaining to the problem; for example, movement data might be recorded at a resolution  $\Delta t$  of every 15 minutes, though this is much shorter than the typical interval in epidemiological models.

**Temporal scaling.** Increasing scales of temporal aggregation can provide different results and absorb more noise in data by matching biologically-relevant timescales. For example, if  $\Delta t$  is 15 minutes then  $100\Delta t$  is approximately one diurnal cycle,  $3,000\Delta t$  is approximately a lunar cycle, and  $10,000\Delta t$  is approximately the length of one season in a four season year. Models can also be downscaled, which might be appropriate under highly data intensive conditions. However, as fine-scale processes emerge at finer scales, models might lose predictive accuracy without incorporating finer data or processes.

**Appropriate complexity.** At various spatiotemporal levels of resolution different epidemic models might apply and the question arises as to the appropriate level of complexity in the model (Larsen *et al.* 2016). For example, models should include a within-host component at the level of  $\Delta t = 15\text{min}$ , while epidemiological models might include daily rates of detection and isolation of individuals at diurnal levels of resolution, or could include transmission rates that exhibit seasonal variation if epidemics last several months or more. Additionally, incorporation of movement into models might require individual-based approaches for the finest scales of analysis (Getz 2013).

**Multiscale modeling.** As data and models are aggregated, models can be run to reflect the multiple timescales on which movement and epidemiological processes operate. Wavelet decomposition of movement data can inform the most important concurrent scales of movement processes; similar analyses can be performed with time-series epidemiological data, when available.



Table 1: Connecting Movement Methods to Disease Outcomes

| Method              | Description                                                                                                                                                                                                                                                                      | Input data                                                                                                                                          | Methodology                                                                                               | Benefits and insights                                                                                                                                       | Reference                                                                     |
|---------------------|----------------------------------------------------------------------------------------------------------------------------------------------------------------------------------------------------------------------------------------------------------------------------------|-----------------------------------------------------------------------------------------------------------------------------------------------------|-----------------------------------------------------------------------------------------------------------|-------------------------------------------------------------------------------------------------------------------------------------------------------------|-------------------------------------------------------------------------------|
| Spatial overlap     | Estimate spatial overlap among hosts from their shared space use (a.k.a. passive interactions)                                                                                                                                                                                   | Coarse-grained spatial locations from multiple individuals                                                                                          | Various home range indices: minimum convex polygon, kernel density estimators, and local convex hulls     | Identifying zones (or spatial scales) of potential influence and evaluating the likelihood of transmission for (primarily) indirectly transmitted pathogens | Yockney <i>et al.</i> 2013; Farnsworth <i>et al.</i> 2006                     |
| Habitat selection   | Environmental covariates can be used to predict areas of increased exposure risk based on the correspondence of host movements with models of vector/pathogen habitat preference                                                                                                 | Host resource selection data; environmental predictors (e.g., landcover, temperature, water availability); vector/pathogen habitat suitability data | Resource selection functions are used determine habitat preference of host and parasite                   | A spatially explicit map of risk of exposure and transmission                                                                                               | Ragg & Moller 2000; Morris <i>et al.</i> 2016                                 |
| Behavioral analysis | Movement data can be used to identify specific behavioral states or canonical activity modes that affect the risk of exposure or transmission. Overlaying these behaviors on maps of environmental heterogeneity in pathogen prevalence can provide behavior-dependent risk maps | High resolution movement data or complementary behavioral data (e.g., accelerometer); maps of pathogen prevalence                                   | Various methods to identify behavioral states from movement (and associated) data                         | A spatially-explicit prediction of the effects of behavior on infection risk (i.e., behavior- or individual-specific risk maps)                             | Gurarie <i>et al.</i> 2016; Nathan <i>et al.</i> 2012                         |
| Network analysis    | Calculate co-occurrence of individuals, dyads (a.k.a. dynamic interactions), and members of fission-fusion groups as a proxy for transmission                                                                                                                                    | Spatial proximity or simultaneous spatial tracking of multiple sympatric individuals                                                                | Proximity sensors or fine-scale movement data to build networks from which various metrics can be derived | Identify direct contacts in the population as a proxy for transmission; isolate variation among individuals                                                 | Cross <i>et al.</i> 2005; Hamede <i>et al.</i> 2009; Silk <i>et al.</i> 2017a |
